# Supplementary material
Source: MDPI journal article supplement (https://www.mdpi.com/2073-4395/11/12/2424)
Supplement: s1 [file s1]

**Table S5.** Expression of DEMs in inter-genus and intra-genus microbial co-culture vs mono-culture.

| Pathway                 | Metabolisms                | LA+BC_BC | LA+BC_LA | LA+LC_LC | LA+LC_LA |
|-------------------------|----------------------------|----------|----------|----------|----------|
| Carbohydrate metabolism | UDP-N-acetylmuramate       | 6.306    | 4.222    | -4.332   |          |
|                         | dTDP-L-rhamnose            |          | 1.712    | -1.002   |          |
|                         | UDP-glucuronate            | 5.801    | 3.225    | -3.660   |          |
|                         | UDP-D-galactose            |          | 4.816    |          |          |
|                         | UDP-glucose                | 1.714    | 3.625    | -2.865   |          |
|                         | UDP-rhamnose               | 3.316    | 4.463    | -3.496   |          |
|                         | N-Acetylmuramate           | 6.306    | 4.222    | -4.332   |          |
|                         | D-Fructose-6P              | 3.232    | 2.119    | -2.238   |          |
|                         | sed-1,7-bP                 |          | -4.863   | 7.014    | 1.384    |
|                         | ADP-Mannose                |          | 4.336    | -5.147   |          |
|                         | 3-Phospho-D-glycerate      | -2.978   |          |          |          |
|                         | Lecithin                   |          |          | 3.011    | 5.018    |
|                         | GDP-fucose                 | 5.695    | 33.762   | -7.508   |          |
|                         | Glyceraldehyde 3-phosphate | 3.827    | 10.135   | -31.716  |          |
|                         | Citrate                    | 1.288    | 1.562    |          |          |
|                         | L-2-Aminoadipate           |          |          | 2.278    |          |
| Amino metabolism        | Lacert                     |          |          | 3.548    | 3.814    |
|                         | O-Acetyl-L-serine          | -10.667  |          |          |          |
|                         | Betaine                    | -5.477   |          |          |          |
|                         | Glutamate                  | -3.259   |          |          |          |
|                         | SAM                        | -9.039   |          |          |          |
|                         | SAH                        | 4.644    |          | 1.842    |          |
|                         | AHLs                       |          | -5.762   | 4.413    | -0.799   |
|                         | Phosphoribosyl-AMP         | 4.191    |          |          |          |
|                         | Tyrosine                   | 1.016    | 1.321    | -1.625   | -1.994   |
|                         | Histidinol                 |          | 1.186    |          |          |
|                         | Pipecolate                 | 4.935    |          |          |          |
|                         | Glutamic                   | -3.437   |          |          |          |

|                              |                                 |         |         |         |       |
|------------------------------|---------------------------------|---------|---------|---------|-------|
|                              | Arginine                        | -2.445  | 2.080   |         |       |
|                              | Hydroxyproline                  |         |         | -5.249  |       |
| Nucleotide                   | ADP-ribose                      | 3.690   | 2.461   |         |       |
|                              | UMP                             | -0.685  | 2.853   |         |       |
|                              | UDP                             | 2.018   | 4.685   |         |       |
|                              | CMP                             | -2.436  |         |         |       |
|                              | CTP                             | 34.130  | 7.617   |         |       |
|                              | GMP                             | -2.406  |         |         |       |
|                              | AMP                             | 1.723   |         |         |       |
|                              | ADP                             | 3.570   | 4.636   |         |       |
|                              | dADP                            |         | 5.892   | -7.998  |       |
|                              | ATP                             | 3.392   | 3.144   |         |       |
|                              | PsiMP                           | -1.027  | 3.530   |         |       |
|                              | dTDP                            | 6.519   |         |         |       |
|                              | Urate                           |         | 9.198   |         |       |
|                              | FAD                             | 1.473   | 2.031   |         |       |
| Vitamin                      | PLP                             |         | 2.047   |         |       |
|                              | 4-HBA                           |         |         | 8.225   |       |
|                              | Gentisate                       |         | -33.734 | 6.440   |       |
|                              | Niacinamide                     | 2.796   | 2.199   | -1.051  |       |
|                              | NAD                             | -3.604  |         |         |       |
|                              | NADH                            |         |         | -6.041  |       |
|                              | NADHX                           |         |         | -31.694 |       |
|                              | Dephospho-CoA                   | 3.517   | 33.117  |         |       |
|                              | Lecithin                        |         |         | 5.69    | 3.01  |
| Hormone<br>and<br>antibiotic | Indole                          | -0.617  |         | -0.507  |       |
|                              | Questiomycin A                  |         | -13.608 | 4.440   |       |
|                              | Quinolinic acid                 | -37.542 |         |         |       |
|                              | Picolinic acid                  | -36.443 | -32.929 |         |       |
|                              | Phenazine-1,6-dicarboxylic acid |         | -26.090 | 27.325  | 1.235 |
